# Supplementary material for: A lithiophilic AlN-modified copper layer for high-performance lithium metal anodes
Source: Royal Society of Chemistry journal article supplement (doi:10.1039/d2ta02138b), 2022-01-01
Supplement: d2ta02138b1.pdf [file d2ta02138b1.pdf]

## Electronic Supplementary Information

### **Lithiophilic AlN modified copper layer for high-performance lithium metal anode**

Xiaosong Xiong<sup>a</sup>, Rui Sun,<sup>a</sup> Wenqi Yan,<sup>a</sup> Qiao Qiao,<sup>b</sup> Yusong Zhu,<sup>a</sup> Lili Liu,<sup>a</sup> Lijun Fu,<sup>a</sup> Nengfei Yu,<sup>a,\*</sup> Yuping Wu,<sup>\*a,c,d</sup> and Bin Wang<sup>c</sup>

<sup>a</sup> School of Energy Science and Engineering, State Key Laboratory of Materials-oriented Chemical Engineering, Nanjing Tech University, Nanjing, Jiangsu 211816, P. R. China

<sup>b</sup> School of Chemistry and Molecular Engineering, Nanjing Tech University, Nanjing, Jiangsu 211816, P. R. China

<sup>c</sup> National Energy Novel Materials Center, Institute of Chemical Materials (ICM), China Academy of Engineering Physics (CAEP), Mianyang, Sichuan 621900, P. R. China

<sup>d</sup> School of Energy and Environment, South East University, Nanjing, Jiangsu 211189, P. R. China

\*Corresponding authors: yunf@njtech.edu.cn (N.Yu); wuyp@fudan.edu.cn (Y. Wu)

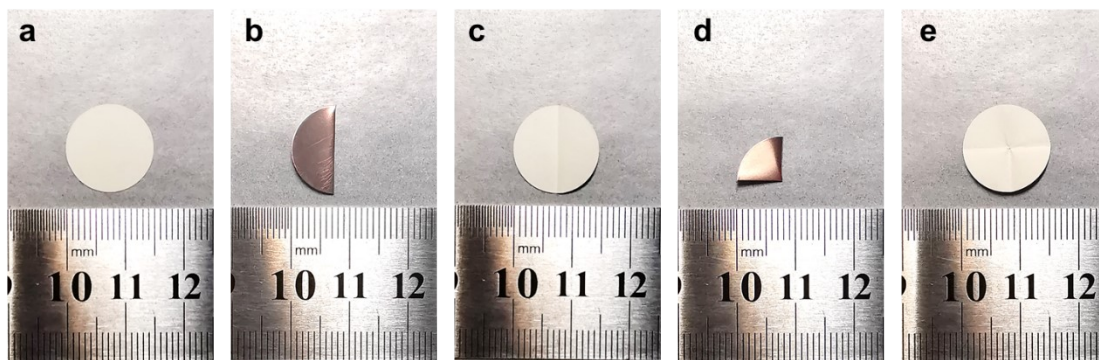

**Figure S1.** Digital images of the folding test for AlN@Cu substrate.

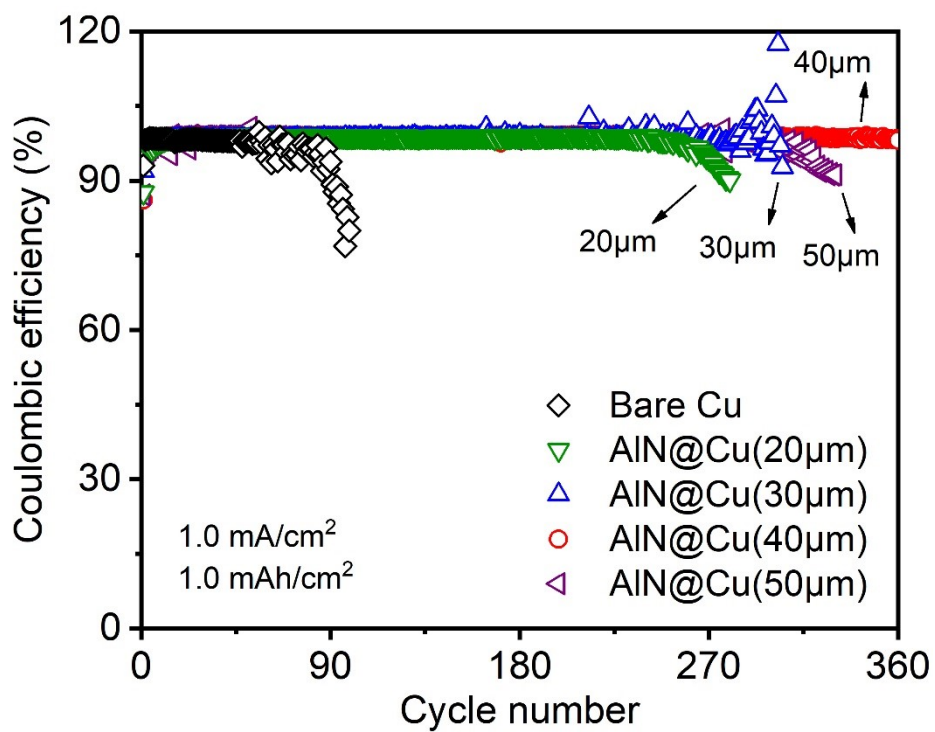

---

**Figure S2.** CEs comparison of bare Cu and AlN@Cu with various thickness (20  $\mu\text{m}$ , 30  $\mu\text{m}$ , 40  $\mu\text{m}$  and 50  $\mu\text{m}$ ).

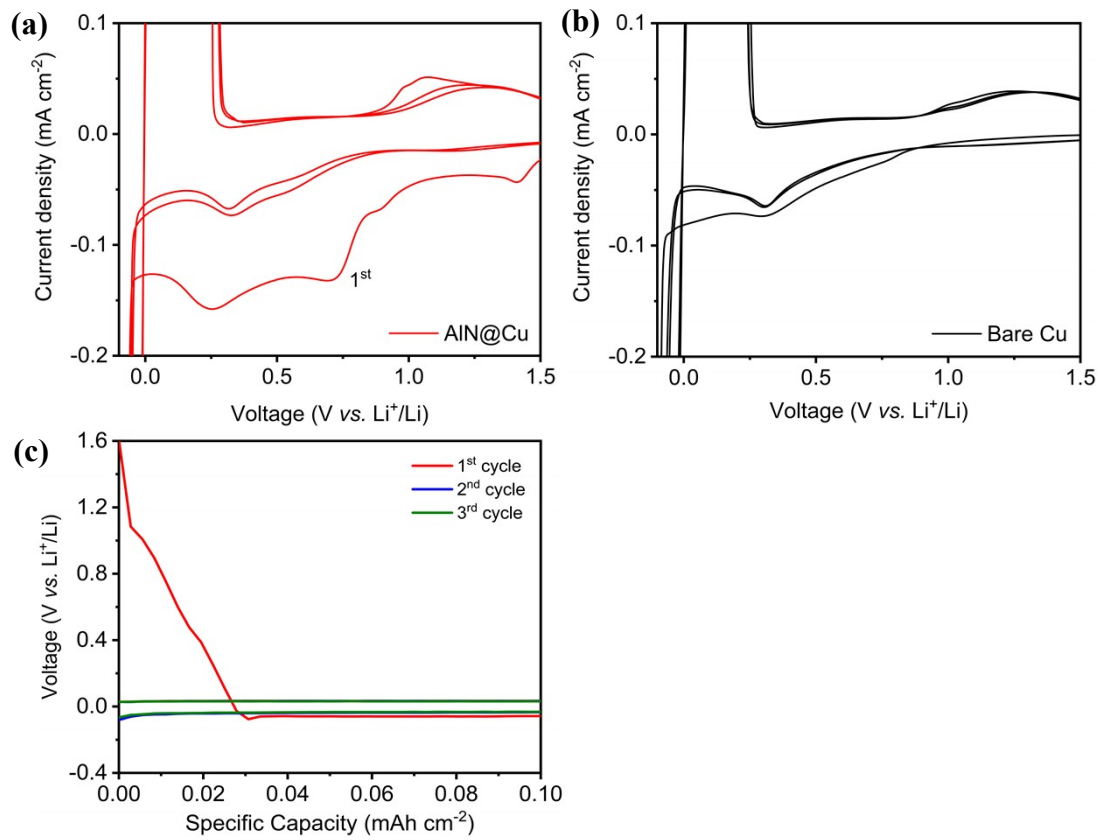

---

**Figure S3.** Enlarged CV curves of half cells (a) with AlN@Cu substrate and (b) with bare Cu substrate, (c) voltage profile of the half cells with AlN@Cu substrate.

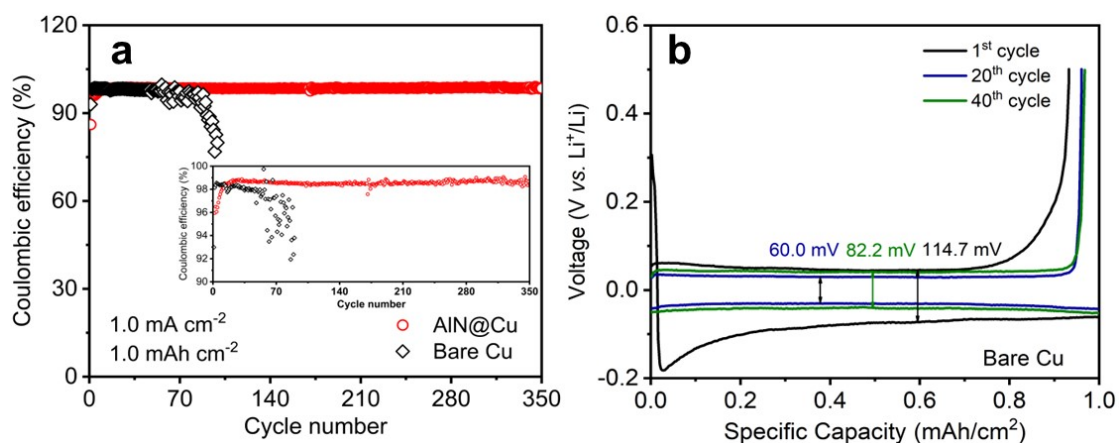

**Figure S4.** Electrochemical performance of half cells. (a) CEs of bare Cu and AIN@Cu at  $1.0 \text{ mA cm}^{-2}$  under fixed capacity of  $1.0 \text{ mAh cm}^{-2}$ ; (b) charge/discharge voltage-capacity profiles of bare Cu at 1<sup>st</sup>, 20<sup>th</sup> and 40<sup>th</sup> cycles.

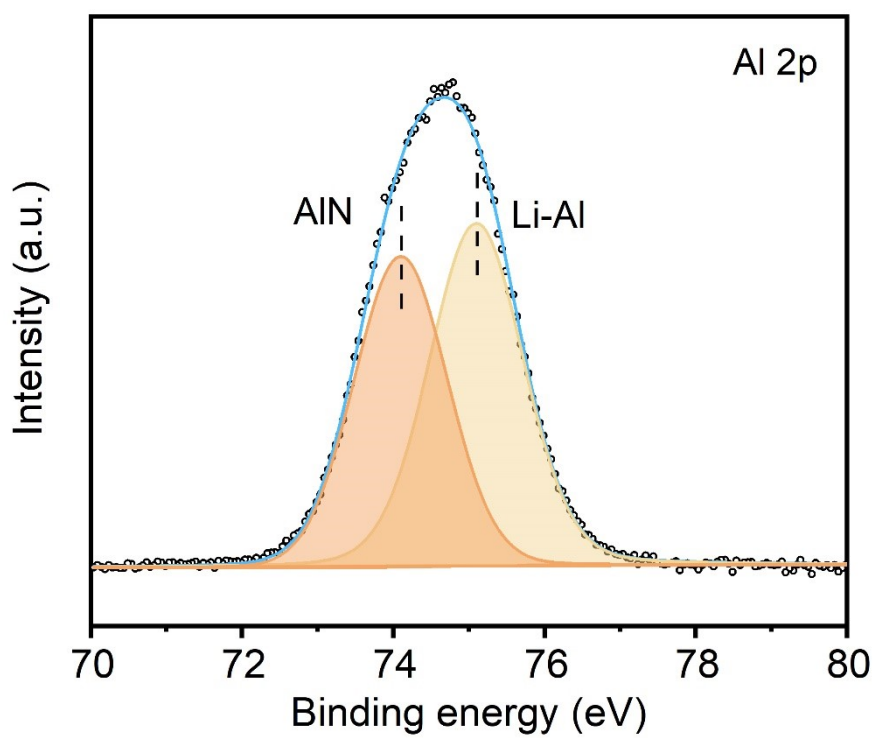

---

**Figure S5.** Al 2p high-resolution XPS spectra of AlN@Cu after initial discharge process.

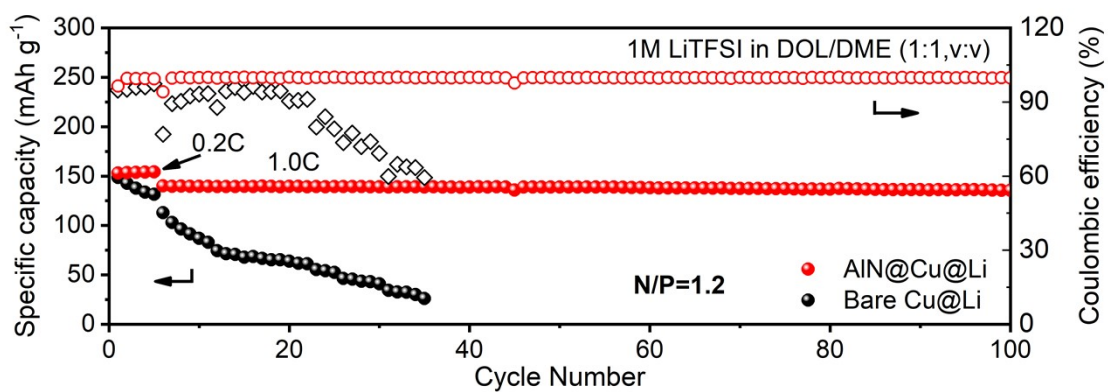

**Figure S6.** Cycling performance of Li/LFP full cells based on 1M LiTFSI in DOL/DME (1:1, v:v) electrolyte at 1.0 C with a restrict N/P ratio of 1.2.



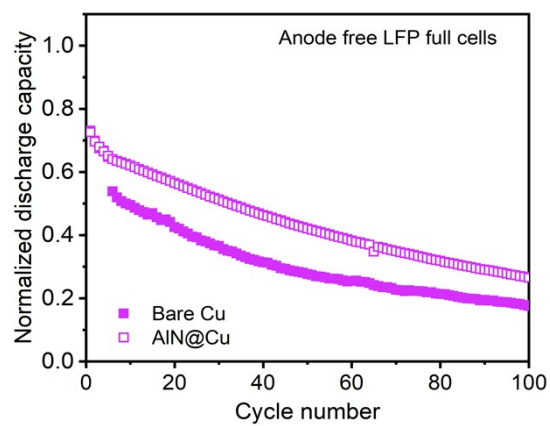

**Figure S7.** Cycling performance of anode free LFP full cells with bare Cu substrate and AlN@Cu substrate.

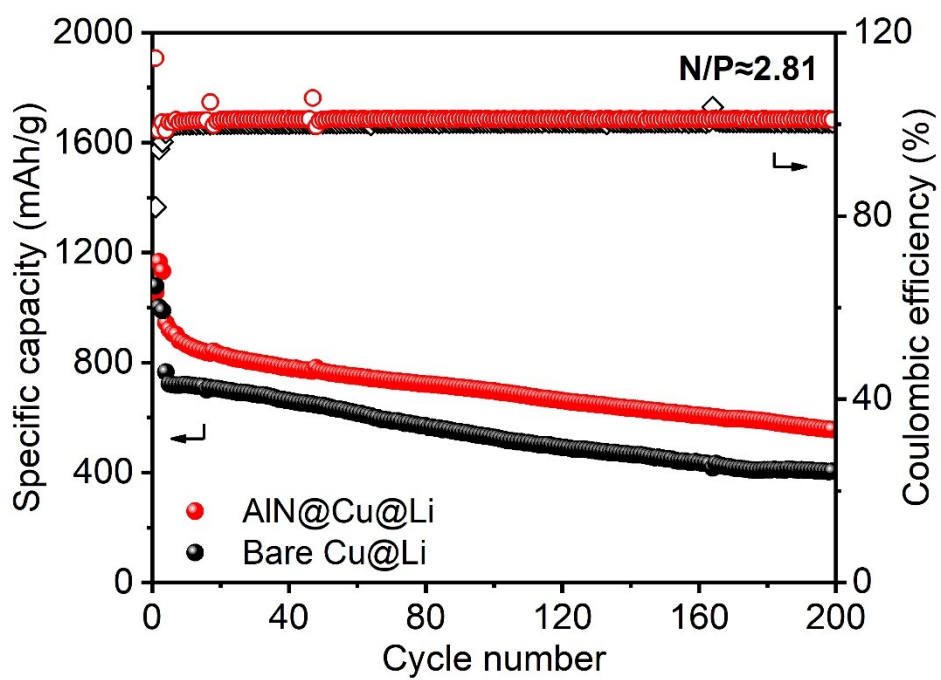

**Figure S8.** Galvanostatic cycling performance of Li/S cells with bare Cu@Li and AlN@Cu@Li at 0.5 C with a restrict N/P ratio of 2.81.

---

**Table S1.** Fitting equivalent circuit model and impedance parameters of half cells.

| 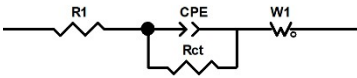 | $R_s$ ( $\Omega$ ) |                  | $R_{ct}$ ( $\Omega$ ) |                  |
|-----------------------------------------------------------------------------------|--------------------|------------------|-----------------------|------------------|
|                                                                                   | 1 <sup>st</sup>    | 20 <sup>th</sup> | 1 <sup>st</sup>       | 20 <sup>th</sup> |
| Modified Cu                                                                       | 9.25               | 9.42             | 44.41                 | 33.69            |
| Pristine Cu                                                                       | 3.41               | 4.64             | 137.62                | 37.25            |

---

**Table S2.** Comparison of cycle performance in Li/Cu half cells with other coating strategies.

| Strategy                                                                                                                           | Electrolyte                                                         | Cycle conditions                                                                                       | Cycle Performance                                | References                                    |
|------------------------------------------------------------------------------------------------------------------------------------|---------------------------------------------------------------------|--------------------------------------------------------------------------------------------------------|--------------------------------------------------|-----------------------------------------------|
| <b>AlN layer</b>                                                                                                                   | <b>1.0 M LiTFSI in DOL/DME (1:1) with 2.0 wt.% LiNO<sub>3</sub></b> | <b>1.0 mA/cm<sup>2</sup>; 1.0 mAh/cm<sup>2</sup><br/>3.0 mA/cm<sup>2</sup>; 1.0 mAh/cm<sup>2</sup></b> | <b>98.5%; ~380 cycles<br/>98.1%; ~160 cycles</b> | <b>This work</b>                              |
| Grain-Boundary-Rich artificial SEI (ZrO <sub>2</sub> , Li <sub>2</sub> O, Li <sub>3</sub> N, and LiN <sub>x</sub> O <sub>y</sub> ) | 1.0 M LiTFSI in DOL/DME (1:1) with 2.0 wt.% LiNO <sub>3</sub>       | 1.0 mA/cm <sup>2</sup> ; 1.0 mAh/cm <sup>2</sup>                                                       | 96.2% ; ~120 cyeles                              | Adv. Funct. Mater. <b>2022</b> , 32, 2107249  |
| Dual-protective interface (inner: Prussian blue (PB); outer: reduced graphene oxide (rGO) )                                        | 1.0 M LiTFSI in DOL/DME (1:1) with 1.0 wt.% LiNO <sub>3</sub>       | 1.0 mA/cm <sup>2</sup> ; 1.0 mAh/cm <sup>2</sup>                                                       | 97.8%; 150 cyeles                                | Adv. Energy Mater. <b>2021</b> , 11, 2102242  |
| LiCl+PVDF-HFP dual-protective layer                                                                                                | 1.0 M LiTFSI in DOL/DME (1:1) with 1.0 wt.%LiNO <sub>3</sub>        | 1.0 mA/cm <sup>2</sup> ; 1.0 mAh/cm <sup>2</sup>                                                       | 99.5%; ~180 cyeles                               | Energy Stor. Mater. <b>2021</b> , 41, 485–494 |
| Aluminum silicate (ASO) fibers coating                                                                                             | 1.0 M LiTFSI in DOL/DME (1:1) with 0.2 M LiNO <sub>3</sub>          | 1.0 mA/cm <sup>2</sup> ; 1.0 mAh/cm <sup>2</sup>                                                       | 97.0% ; ~170 cyeles                              | Chem. Eng. J. <b>2021</b> , 408, 128016       |
| Cu <sub>2</sub> O film                                                                                                             | 1.0 M LiTFSI in DOL/DME (1:1) with 2.0 wt.% LiNO <sub>3</sub>       | 1.0 mA/cm <sup>2</sup> ; 1.0 mAh/cm <sup>2</sup>                                                       | 97.7% ; ~250 cyeles                              | Chem. Eng. J. <b>2022</b> , 433, 133689       |
| Ti <sub>3</sub> C <sub>2</sub> T <sub>x</sub> /g-C <sub>3</sub> N <sub>4</sub> artificial layer                                    | 1.0 M LiTFSI in DOL/DME (1:1) with 1.0 wt.% LiNO <sub>3</sub>       | 1.0 mA/cm <sup>2</sup> ; 1.0 mAh/cm <sup>2</sup>                                                       | 98.0% ; ~320 cycles                              | Adv. Sci. <b>2022</b> , 2103930               |
| PEO/UPy coating                                                                                                                    | 1.0 M LiTFSI in DOL/DME (1:1) with 2.0 wt.% LiNO <sub>3</sub>       | 1.0 mA/cm <sup>2</sup> ; 1.0 mAh/cm <sup>2</sup>                                                       | 98.4% ; ~150 cycles                              | Angew. Chem. Int. Ed. <b>2020</b> , 59, 2055  |
| Dual alloy Li <sub>x</sub> Al-Li <sub>x</sub> P hybrid interface                                                                   | 1.0 M LiTFSI in DOL/DME (1:1) with 2.0 wt.% LiNO <sub>3</sub>       | 1.0 mA/cm <sup>2</sup> ; 1.0 mAh/cm <sup>2</sup>                                                       | 98.5% ; ~300 cycles                              | Chem. Eng. J. <b>2022</b> , 434, 134637       |
| Li <sub>2</sub> S/Li <sub>2</sub> Se coating                                                                                       | 1.0 M LiTFSI in DOL/DME (1:1) with 1.0 wt.% LiNO <sub>3</sub>       | 1.0 mA/cm <sup>2</sup> ; 1.0 mAh/cm <sup>2</sup>                                                       | 98.0% ; ~360 cycles                              | Adv. Funct. Mater. <b>2020</b> , 30, 2001607  |
| PVDF-HFP /Li <sub>7</sub> La <sub>3</sub> Zr <sub>2</sub> O <sub>12</sub>                                                          | 1.0 M LiTFSI in DOL/DME (1:1) with 2.0 wt.% LiNO <sub>3</sub>       | 2.0 mA/cm <sup>2</sup> ; 1.0 mAh/cm <sup>2</sup>                                                       | 95.0% ; ~100 cycles                              | J. Power Sources <b>2020</b> , 450, 227710    |
